# Supplementary material for: Peptide Derivatives of the Zonulin Inhibitor Larazotide (AT1001) as Potential Anti SARS-CoV-2: Molecular Modelling, Synthesis and Bioactivity Evaluation
Source: MDPI journal article supplement (doi:10.3390/ijms22179427), 2021-08-30
Supplement: s1 [file s1]

# Supplementary Material

## Peptide derivatives of the Zonulin Inhibitor Larazotide (AT1001) as potential anti SARS Cov-2: molecular modelling, synthesis and bioactivity evaluation

Simone Di Micco <sup>1,\*</sup>, Simona Musella <sup>1</sup>, Marina Sala <sup>2</sup>, Maria C. Scala <sup>2</sup>, Graciela Andrei <sup>3</sup>, Robert Snoeck <sup>3</sup>, Giuseppe Bifulco <sup>2</sup>, Pietro Campiglia <sup>2</sup> and Alessio Fasano <sup>1,4</sup>

<sup>1</sup>European Biomedical Research Institute of Salerno (EBRIS), via Salvatore De Renzi 50, 84125 Salerno, Italy.

<sup>2</sup>Dipartimento di Farmacia, Università degli Studi di Salerno, Via Giovanni Paolo II 132, 84084 Fisciano, Salerno, Italy.

<sup>3</sup>Rega Institute for Medical Research, Department of Microbiology, Immunology, and Transplantation, KU Leuven, Leuven, 3000 Belgium.

<sup>4</sup>Mucosal Immunology and Biology Research Center, Massachusetts General Hospital–Harvard Medical School, Boston, MA 02114, United States.

### Contents:

|                       |                                                                          |         |
|-----------------------|--------------------------------------------------------------------------|---------|
| <b>Table S1</b>       | Docking scores and QPPCaco values of <b>1-6</b>                          | S2      |
| <b>Table S2</b>       | Dihedral angle analysis of <b>2-6</b>                                    | S3      |
| <b>Table S3</b>       | Averaged $\Delta G_{\text{bind}}$ from md of ligand-protein complexes    | S4      |
| <b>Table S4</b>       | Averaged $\Delta G_{\text{bind}}$ (kcal/mol) for residues from md        | S5      |
| <b>Table S5:</b>      | Analytical data of peptides <b>1-6</b>                                   | S6      |
| <b>Figure S1</b>      | Superimposition of AT1001 (purple) with <b>2-6</b> into M <sup>pro</sup> | S7      |
| <b>Figure S2</b>      | Protein-ligand contact histograms during the simulation                  | S8      |
| <b>Figure S3-S7</b>   | RMSD of <b>2-6</b>                                                       | S9-S13  |
| <b>Figure S8</b>      | RMSD of protein C $\alpha$ atoms bound to <b>2-6</b>                     | S14     |
| <b>Figure S9</b>      | N3 docked and crystallized pose overlay                                  | S15     |
| <b>Figure S10-S15</b> | HRMS spectra and HPLC chromatograms of peptide <b>1-6</b>                | S16-S21 |
| <b>Figure S16</b>     | Dose-response curves                                                     | S22     |

**Table S1.** Docking scores and Predicted apparent Caco-2 cell permeability (QPPCaco) by QikProP of Schrödinger suite for ligands.

| peptide             | docking score<br>(kcal/mol) | QPPCaco <sup>a</sup> (nm/s) |
|---------------------|-----------------------------|-----------------------------|
| AT1001 ( <b>1</b> ) | −12.574                     | 0.002                       |
| <b>2</b>            | −11.522                     | 0.012                       |
| <b>3</b>            | −11.209                     | 0.050                       |
| <b>4</b>            | −11.240                     | 0.143                       |
| <b>5</b>            | −12.217                     | 0.734                       |
| <b>6</b>            | −9.103                      | 40.709                      |

**Table S2.** Mean values of  $\phi$ ,  $\psi$  and  $\chi_1$  angles and  $\alpha$ C distances relative to the bound conformations **2-6** into M<sup>pro</sup> catalytic site.

| peptide  | $\beta$ -turn | $\gamma$ -turn | sequence | i+1    |        |          | i+2    |        |          | $\alpha$ C distance (Å) |          |
|----------|---------------|----------------|----------|--------|--------|----------|--------|--------|----------|-------------------------|----------|
|          |               |                |          | $\phi$ | $\psi$ | $\chi_1$ | $\phi$ | $\psi$ | $\chi_1$ | i to i+2                | i to i+3 |
| <b>1</b> | VIa2          | -              | V5-G8    | -109.2 | 119.8  | -177.8   | -77.8  | -38.2  | 30       | -                       | 4.9      |
|          | -             | inverse        | V3-V5    | -84.1  | 46.6   | -60.3    | -      | -      | -        | 5.8                     | -        |
| <b>2</b> | VIa2          | -              | V5-G8    | -103.8 | 123.4  | -177.7   | -78.6  | -35.8  | 30.5     | -                       | 5.2      |
| <b>3</b> | IV            | -              | V5-G8    | -92.9  | 125.3  | -78.4    | -77.9  | -41.5  | 28.7     | -                       | 5.2      |
| <b>4</b> | IV            | -              | V5-G8    | -98.8  | 124.5  | -75.4    | -75.4  | -38.0  | 27.8     | -                       | 5.1      |
|          | -             | inverse        | V3-V5    | -89.6  | 47.7   | -85.3    | -      | -      | -        | 5.7                     | -        |
| <b>5</b> | -             | inverse        | V2-V4    | -78.5  | 48.3   | -55.8    | -      | -      | -        | 5.8                     | -        |
| <b>6</b> | -             | inverse        | V2-V4    | -85.8  | 54.7   | -68.6    | -      | -      | -        | 5.7                     | -        |

**Table S3.** Averaged  $\Delta G_{\text{bind}}$  from molecular dynamics of ligand-protein complexes predicted by MM-GBSA.

| peptide             | $\Delta G_{\text{bind}}$ (kcal/mol) |
|---------------------|-------------------------------------|
| AT1001 ( <b>1</b> ) | -109.42                             |
| <b>2</b>            | -113.23                             |
| <b>3</b>            | -120.94                             |
| <b>4</b>            | -118.19                             |
| <b>5</b>            | -105.88                             |
| <b>6</b>            | -85.88                              |

**Table S4.** Averaged  $\Delta G_{\text{bind}}$  (kcal/mol) for residues around 5 Å from ligand, derived from molecular dynamics of ligand-protein complexes predicted by MM-GBSA.

|        | 1             | 2            | 3            | 4            | 5            | 6            |
|--------|---------------|--------------|--------------|--------------|--------------|--------------|
| THR24  | -0.68         | -0.65        | -0.46        | -0.80        | -0.15        | 0.00         |
| THR25  | <b>-4.36</b>  | <b>-4.74</b> | <b>-4.68</b> | <b>-4.60</b> | <b>-4.11</b> | -0.51        |
| THR26  | <b>-5.83</b>  | <b>-4.14</b> | <b>-5.78</b> | <b>-5.88</b> | <b>-4.99</b> | <b>-1.36</b> |
| LEU27  | <b>-2.15</b>  | <b>-1.79</b> | <b>-1.64</b> | <b>-2.02</b> | <b>-1.89</b> | <b>-1.37</b> |
| PRO39  | -0.22         | -0.13        | 0.00         | -0.03        | 0.00         | 0.03         |
| HIS41  | <b>-1.86</b>  | <b>-1.76</b> | <b>-1.70</b> | <b>-1.70</b> | <b>-1.65</b> | -0.58        |
| VAL42  | -0.30         | -0.34        | -0.31        | -0.40        | -0.20        | -0.12        |
| CYS44  | -0.11         | -0.09        | -0.10        | -0.13        | 0.03         | -0.07        |
| THR45  | -0.09         | -0.26        | -0.35        | -0.43        | -0.01        | 0.00         |
| SER46  | -0.51         | -0.19        | <b>-1.51</b> | -0.73        | -0.06        | 0.04         |
| MET49  | <b>-1.44</b>  | <b>-1.14</b> | <b>-1.92</b> | <b>-1.98</b> | -0.58        | -0.20        |
| TYR54  | 0.10          | 0.01         | -0.02        | 0.06         | -0.04        | 0.04         |
| TYR118 | -0.42         | 0.01         | 0.43         | 0.13         | 0.26         | 0.19         |
| ASN119 | <b>-1.96</b>  | <b>-1.43</b> | <b>-1.38</b> | <b>-1.30</b> | <b>-1.66</b> | -0.24        |
| PHE140 | -0.72         | 0.24         | 0.05         | -0.16        | 0.01         | -0.37        |
| LEU141 | -0.96         | -0.59        | <b>-1.43</b> | -0.76        | -0.63        | -0.52        |
| ASN142 | <b>-11.19</b> | <b>-7.48</b> | <b>-9.21</b> | <b>-8.41</b> | <b>-7.10</b> | <b>-4.17</b> |
| GLY143 | <b>-3.87</b>  | <b>-3.47</b> | <b>-2.98</b> | <b>-3.24</b> | <b>-3.38</b> | <b>-2.84</b> |
| SER144 | <b>-2.01</b>  | <b>-1.74</b> | -0.86        | <b>-1.22</b> | -0.97        | -0.98        |
| CYS145 | <b>-4.31</b>  | <b>-3.49</b> | <b>-3.25</b> | <b>-3.89</b> | <b>-3.99</b> | <b>-3.61</b> |
| HIS163 | <b>-1.04</b>  | -0.35        | <b>-1.14</b> | <b>-1.15</b> | <b>-1.14</b> | -0.95        |
| HIS164 | <b>-3.78</b>  | <b>-3.35</b> | <b>-1.87</b> | <b>-2.60</b> | <b>-2.69</b> | <b>-2.49</b> |
| MET165 | <b>-6.79</b>  | <b>-6.43</b> | <b>-6.14</b> | <b>-5.23</b> | <b>-6.15</b> | <b>-4.24</b> |
| GLU166 | <b>-6.50</b>  | <b>-6.19</b> | <b>-6.04</b> | <b>-4.82</b> | <b>-5.86</b> | <b>-4.99</b> |
| LEU167 | -0.77         | <b>-1.69</b> | <b>-1.35</b> | <b>-1.91</b> | -0.81        | -0.49        |
| PRO168 | -0.40         | <b>-1.99</b> | <b>-1.75</b> | <b>-2.47</b> | -0.60        | 1.18         |
| GLY170 | -0.01         | 0.19         | -0.06        | -0.26        | 0.14         | 0.16         |
| HIS172 | -0.62         | -0.66        | -0.93        | -0.42        | <b>-1.12</b> | -0.94        |
| PHE181 | -0.03         | -0.06        | -0.01        | 0.00         | 0.05         | 0.03         |
| ASP187 | 0.24          | -0.29        | 0.43         | -0.07        | -0.01        | -0.19        |
| ARG188 | -0.39         | -0.65        | <b>-1.22</b> | -0.70        | -0.37        | -0.56        |
| GLN189 | <b>-3.08</b>  | <b>-2.99</b> | <b>-3.49</b> | <b>-3.68</b> | <b>-3.87</b> | <b>-2.93</b> |

The values in bold are  $\leq -1$  kcal/mol.

**Table S5.** Analytical data of peptides **1-6**.

| Peptide  | Sequence                       | HPLC<br><i>k'</i> <sup>a</sup> | ESI-MS   |
|----------|--------------------------------|--------------------------------|----------|
| <b>1</b> | GGVLVQPG                       | 6.23                           | 726.4125 |
| <b>2</b> | Ac-GGVLVQPG-NH <sub>2</sub>    | 6.68                           | 767.4402 |
| <b>3</b> | Ac-GGVLVQPG-NHCH <sub>3</sub>  | 5.17                           | 781.4580 |
| <b>4</b> | Piv-GGVLVQPG-NHCH <sub>3</sub> | 6.42                           | 823.5031 |
| <b>5</b> | Ac-GVLVQ-NHCH <sub>3</sub>     | 7.22                           | 570.3594 |
| <b>6</b> | Ac-GVLV-NHCH <sub>3</sub>      | 5.33                           | 442.3006 |

<sup>a</sup>  $k' = [(\text{peptide retention time} - \text{solvent retention time}) / \text{solvent retention time}]$ .

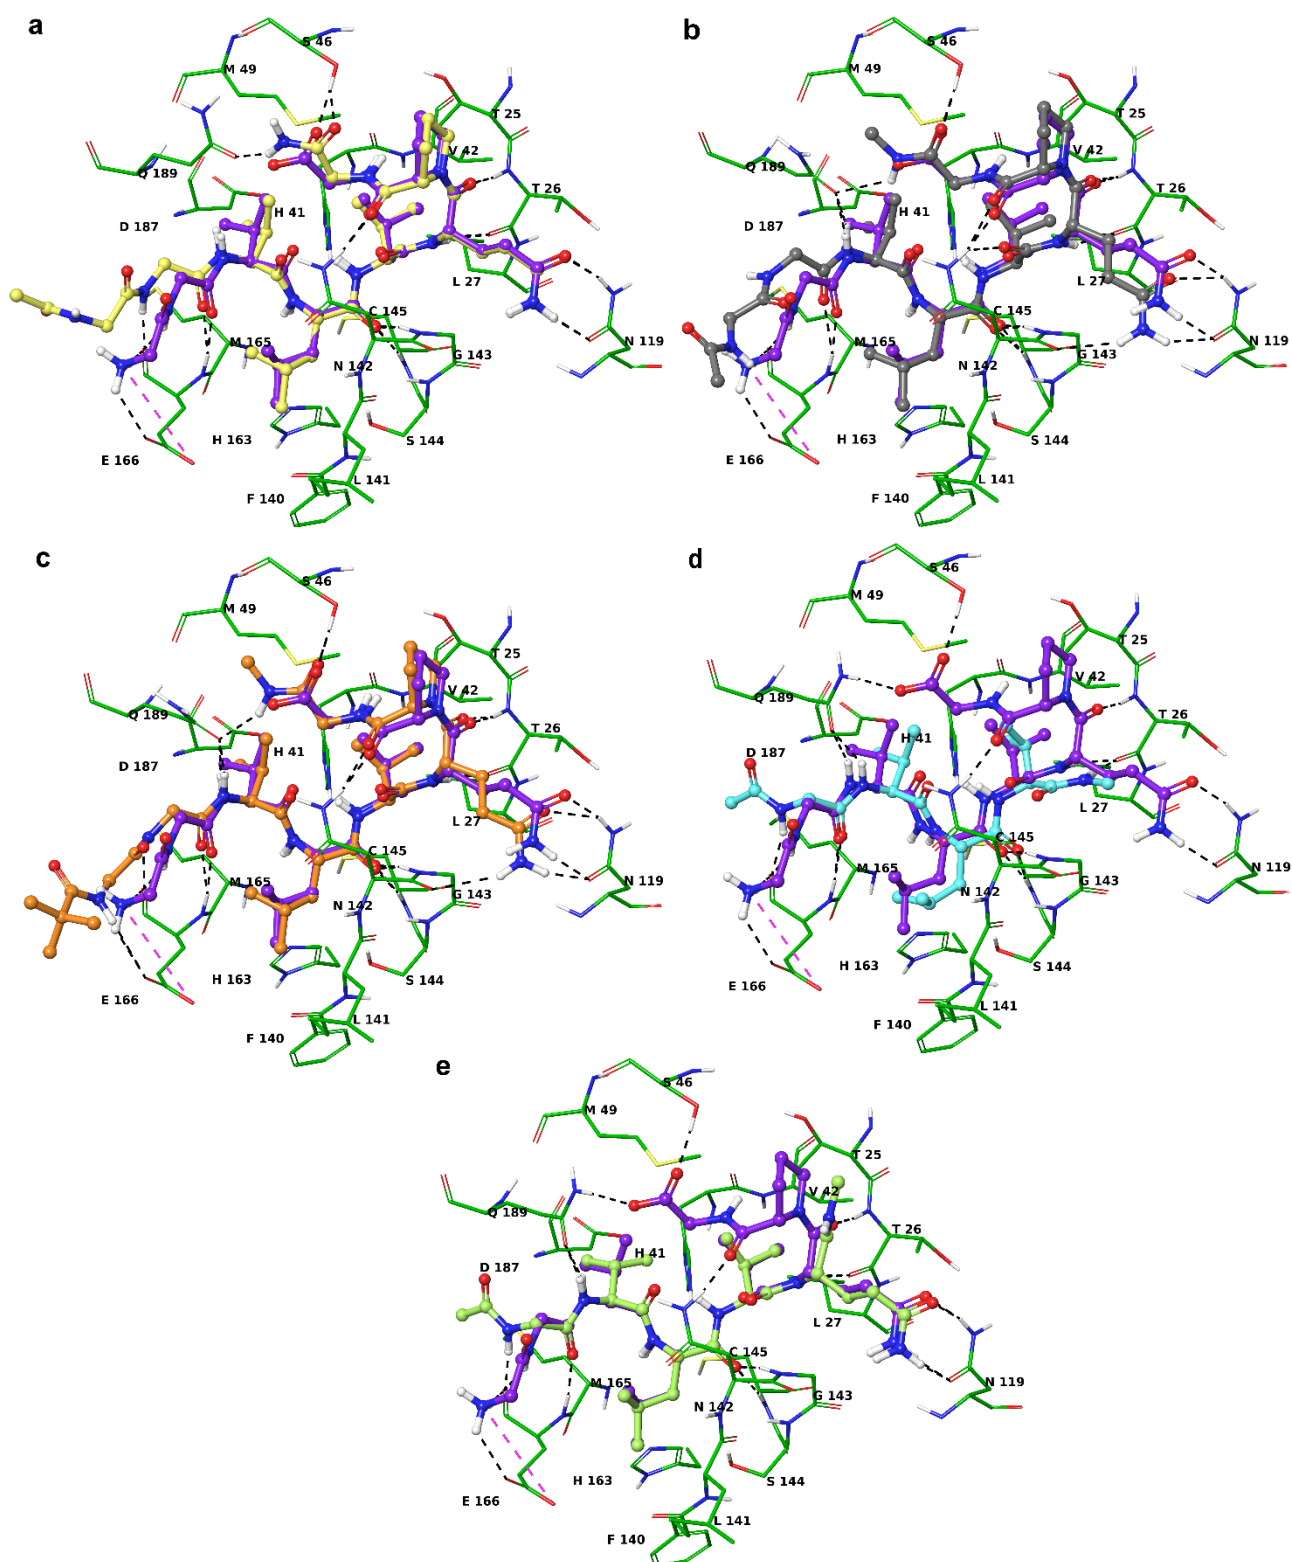

**Figure S1.** Superimposition of AT1001 (purple) with **2** (faded yellow; a), **3** (grey; b), **4** (orange; c), **5** (faded teal; d), and **6** (faded yellow-green; e), into the catalytic site, necessary for viral transcription and replication.

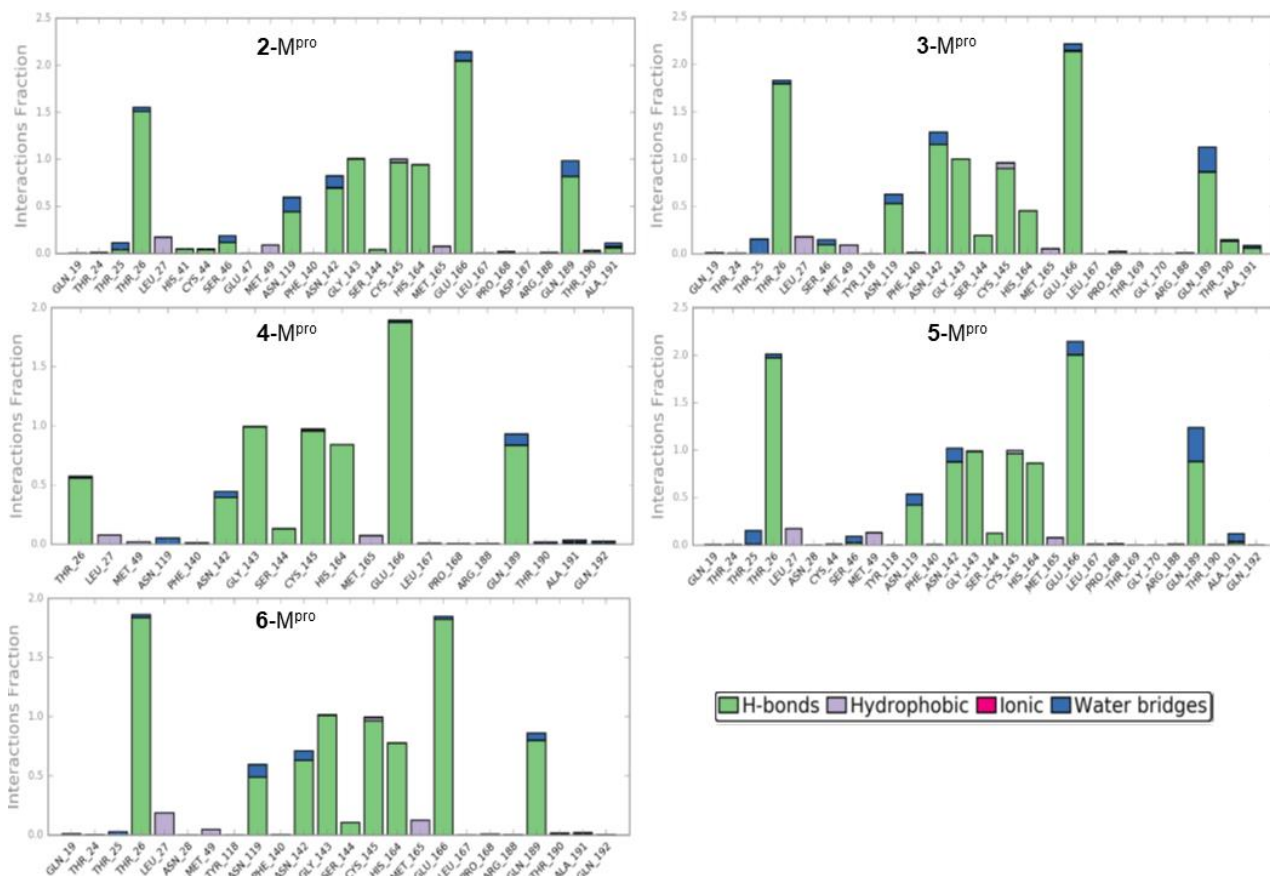

**Figure S2.** Simulation interaction diagrams. Protein-ligand contact histograms during the simulation. Protein-ligand interactions are categorized into four types: Hydrogen Bonds, Hydrophobic, Ionic and Water Bridges. The stacked bar charts are normalized over the course of the trajectory: for example, a value of 0.7 suggests that 70% of the simulation time the specific interaction is maintained. Values over 1.0 are possible as some protein residue may make multiple contacts of same subtype with the ligand.



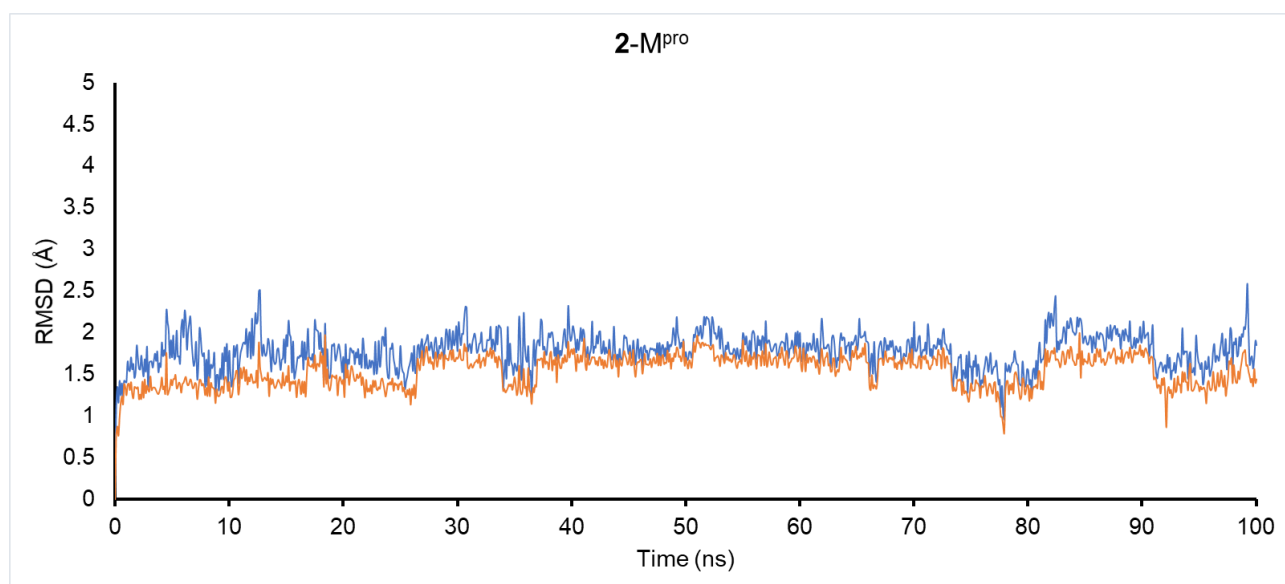

**Figure S3.** Heavy atom-positional RMSD of **2** respect to itself (orange line) and respect to the protein backbone (blue line) as a function of simulation time (ns). The latter RMSD is calculated by first aligning the protein-ligand complex on the protein backbone of the reference and then the RMSD of the ligand heavy atoms is measured.

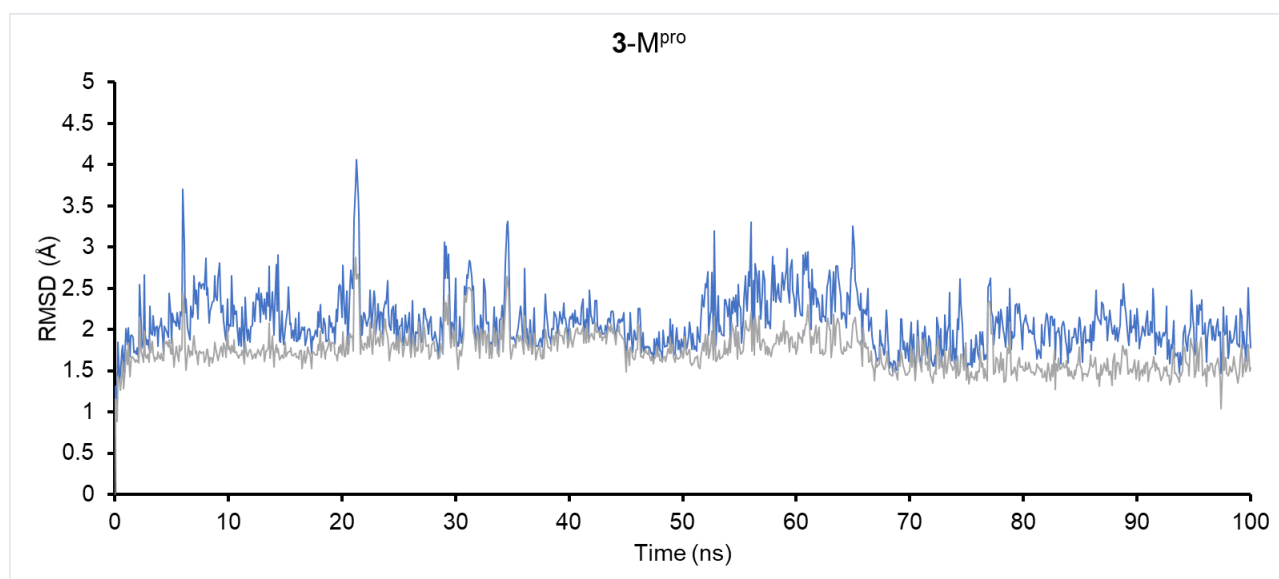

**Figure S4.** Heavy atom-positional RMSD of **3** respect to itself (grey line) and respect to the protein backbone (light-blue line) as a function of simulation time (ns). The latter RMSD is calculated by first aligning the protein-ligand complex on the protein backbone of the reference and then the RMSD of the ligand heavy atoms is measured.

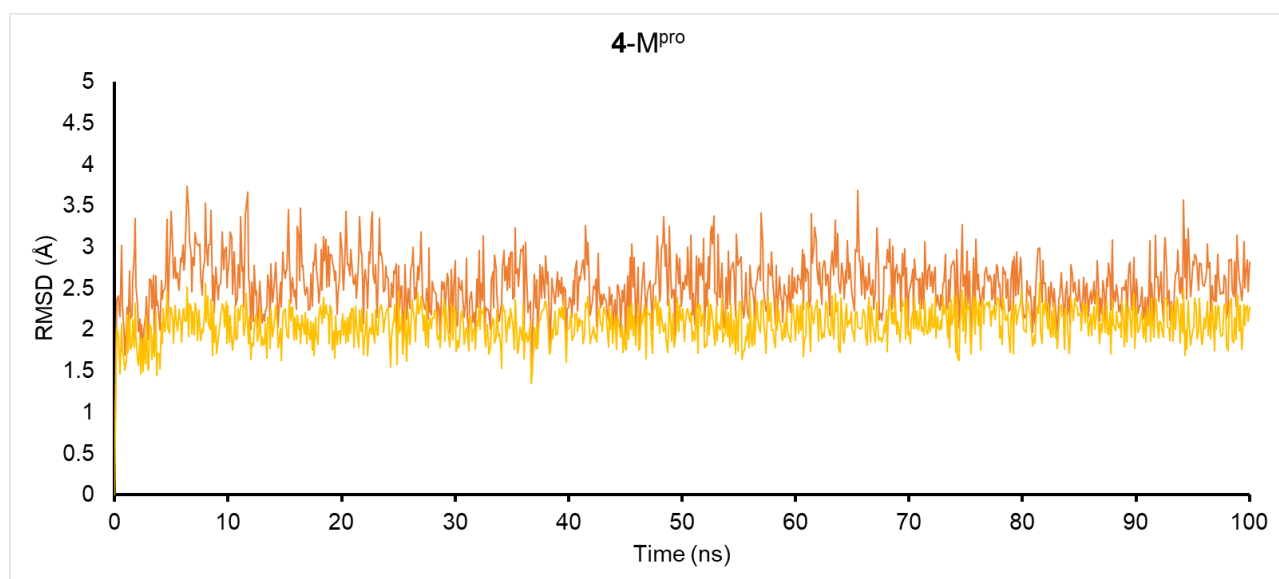

**Figure S5.** Heavy atom-positional RMSD of **4** respect to itself (yellow line) and respect to the protein backbone (orange line) as a function of simulation time (ns). The latter RMSD is calculated by first aligning the protein-ligand complex on the protein backbone of the reference and then the RMSD of the ligand heavy atoms is measured.

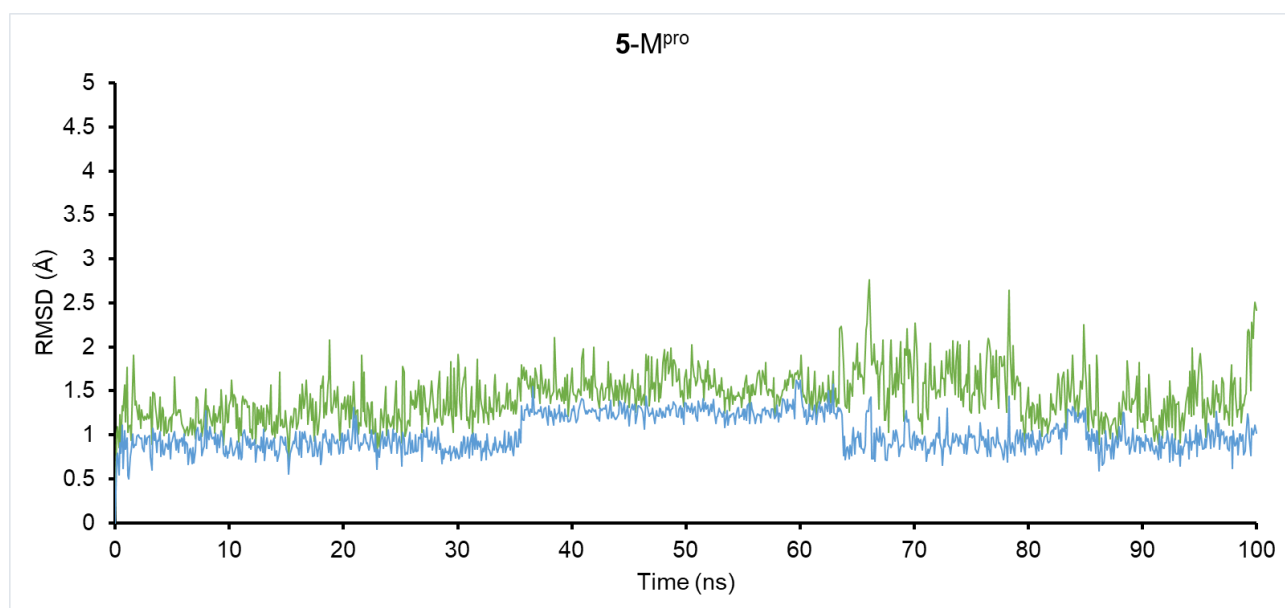

**Figure S6.** Heavy atom-positional RMSD of **5** respect to itself (blue line) and respect to the protein backbone (green line) as a function of simulation time (ns). The RMSD is calculated by first aligning the protein-ligand complex on the protein backbone of the reference and then the RMSD of the ligand heavy atoms is measured.

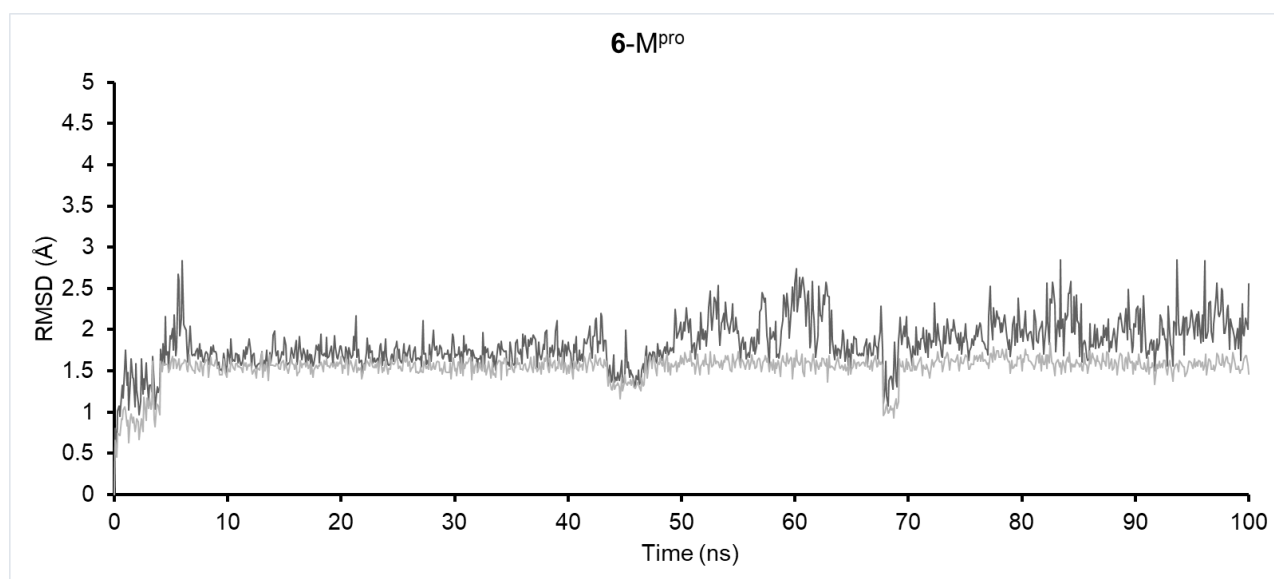

**Figure S7.** Heavy atom-positional RMSD of **6** respect to itself (light-grey line) and respect to the protein backbone (dark-grey line) as a function of simulation time (ns). The RMSD is calculated by first aligning the protein-ligand complex on the protein backbone of the reference and then the RMSD of the ligand heavy atoms is measured.

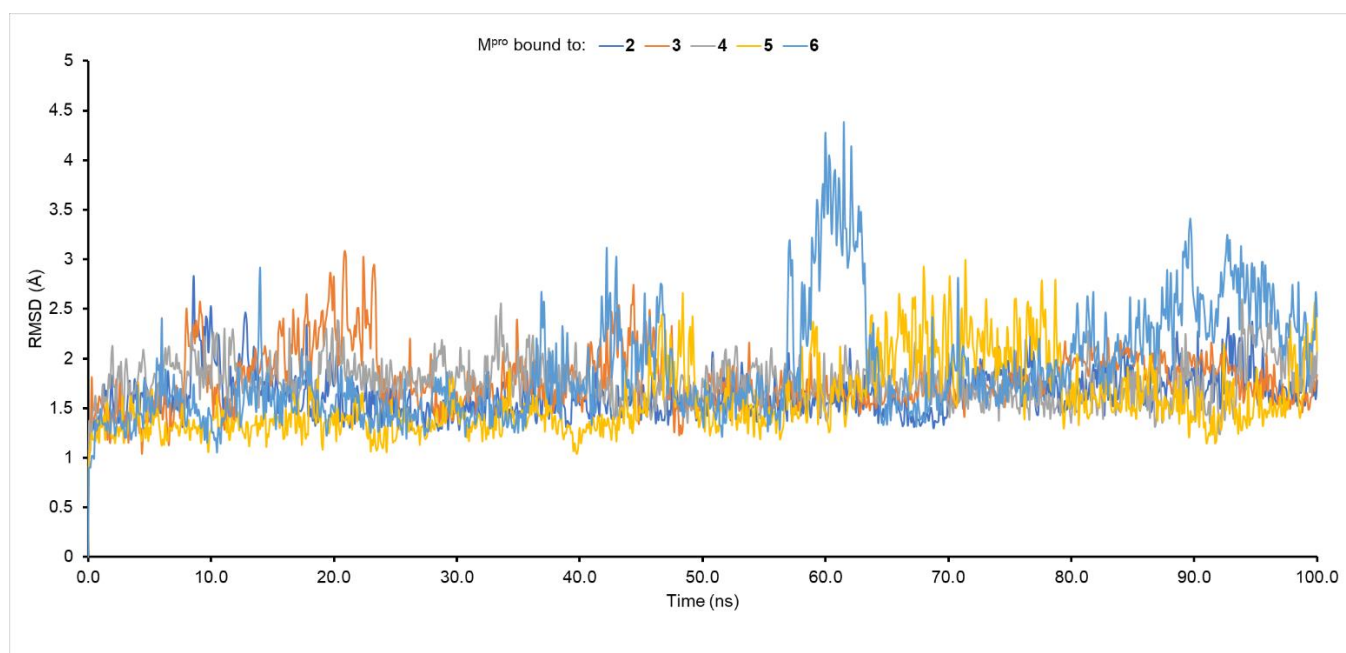

**Figure S8.** RMSD of protein Cα atoms (bound to 2-6) as a function of simulation time (ns).

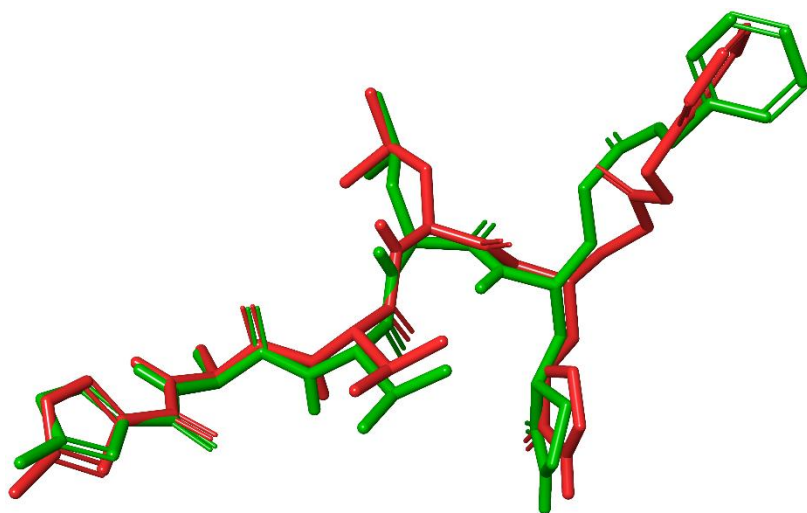

**Figure S9.** Superimposition (1.076 Å) of co-crystallized (red, PDB ID: 6LU7) and docked pose (green) structures of N3.

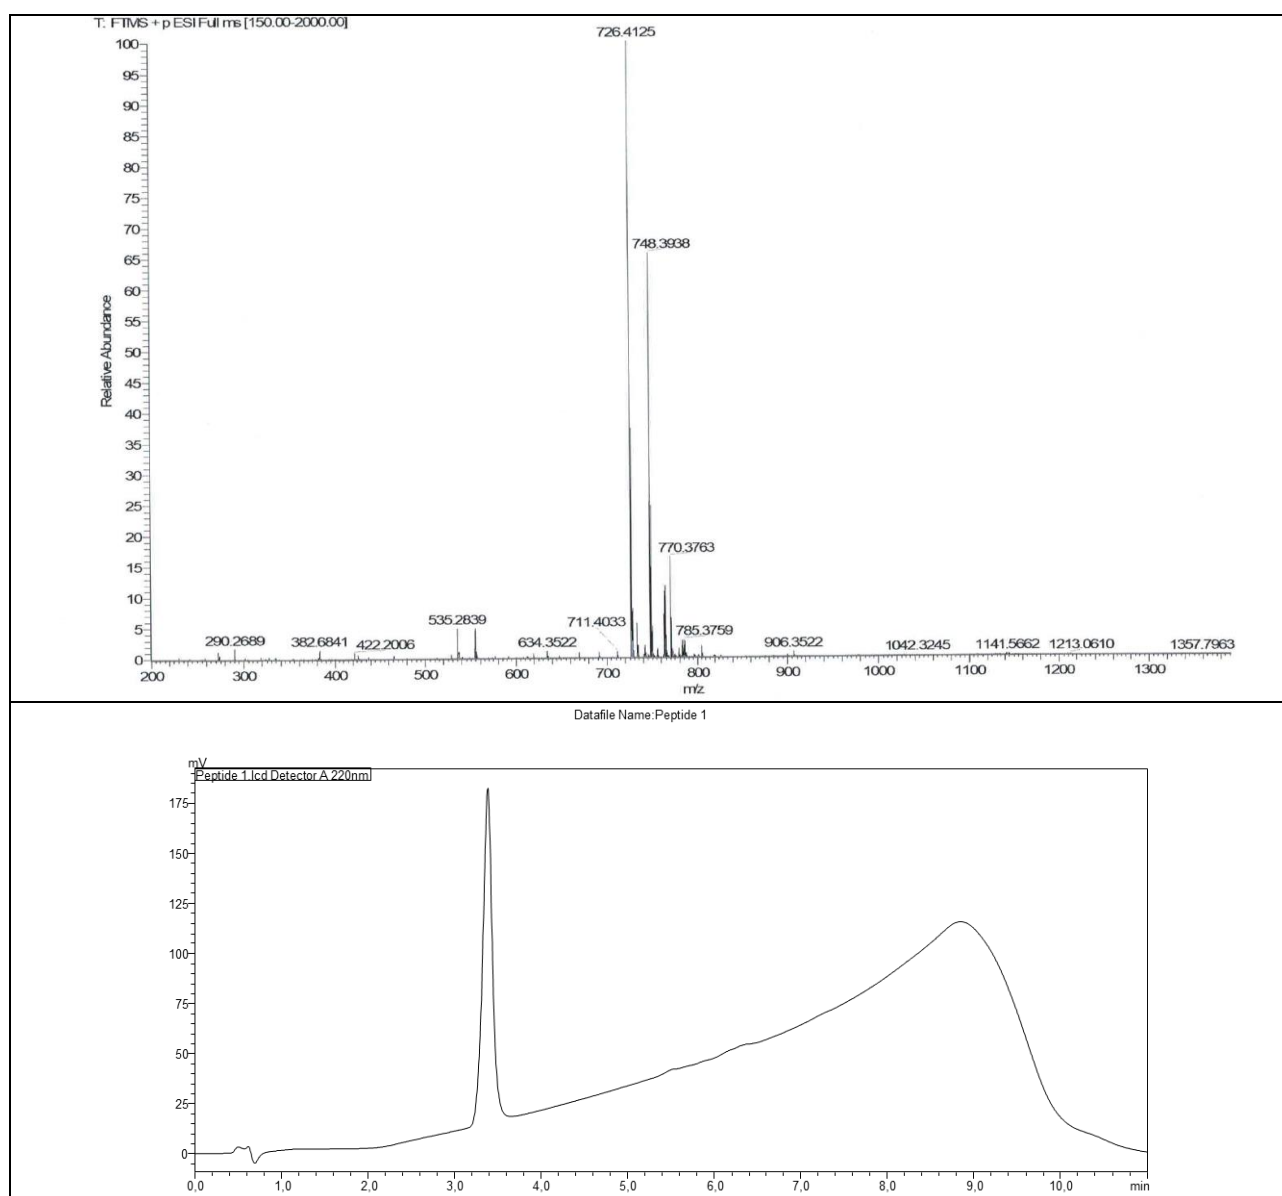

**Figure S10.** HR-ESI-MS of Peptide 1 ion  $[M+H]^+$  (top) and analytical HPLC trace at 220 nm (bottom).



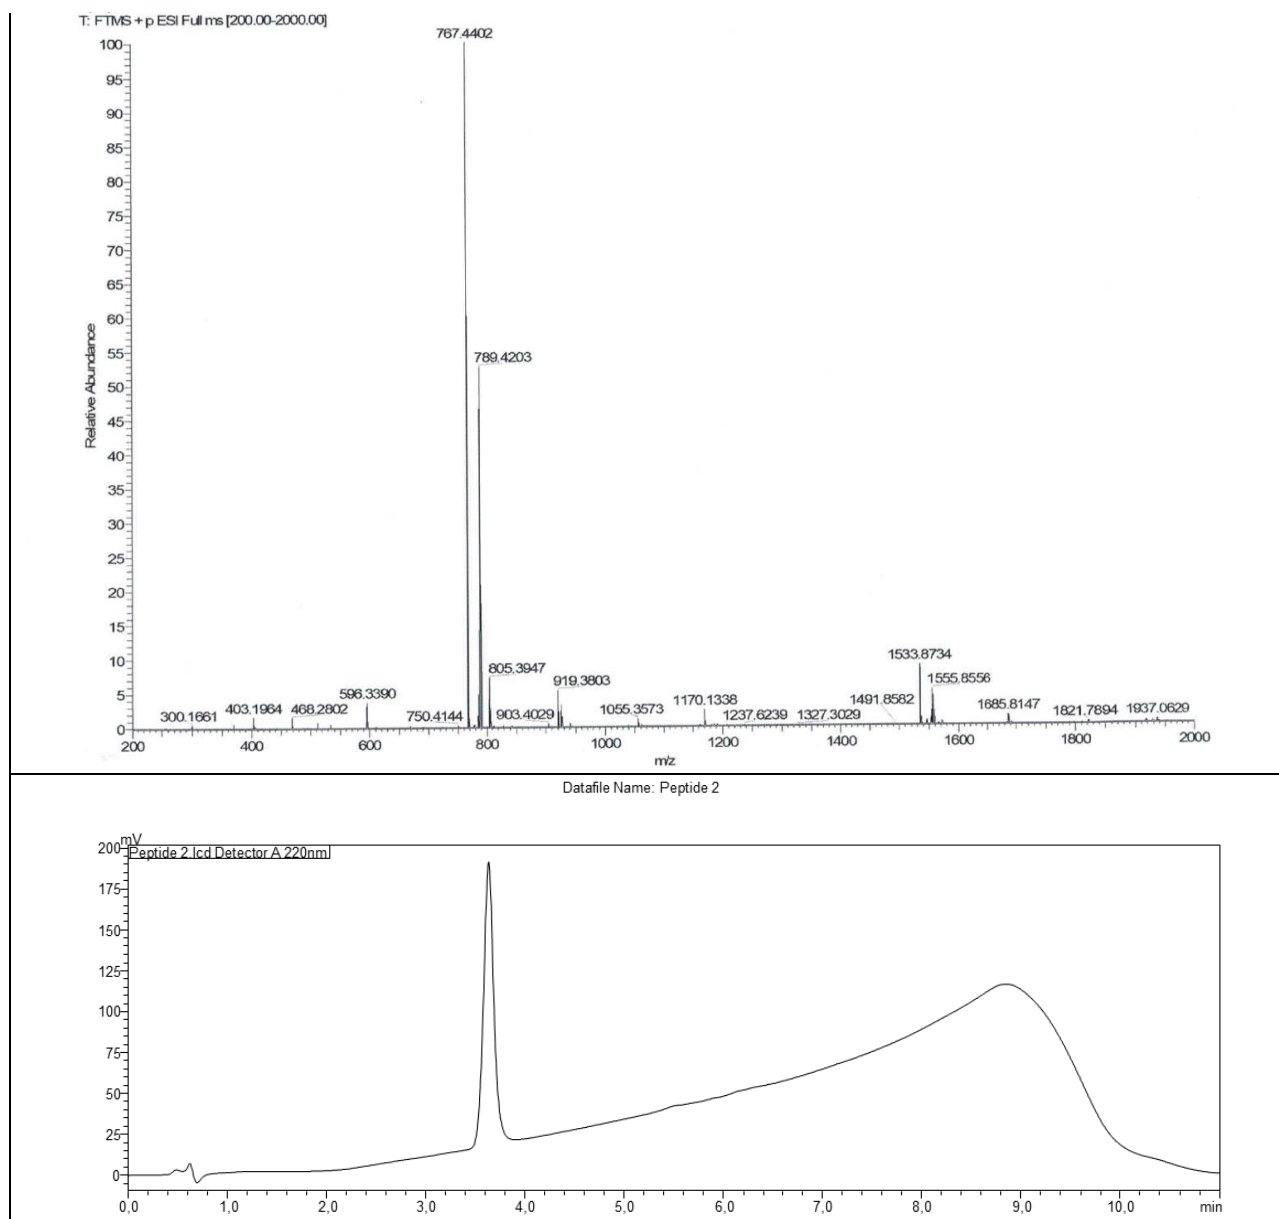

**Figure S11.** HR-ESI-MS of Peptide 2 ion  $[M+H]^+$  (top) and analytical HPLC trace at 220 nm (bottom).

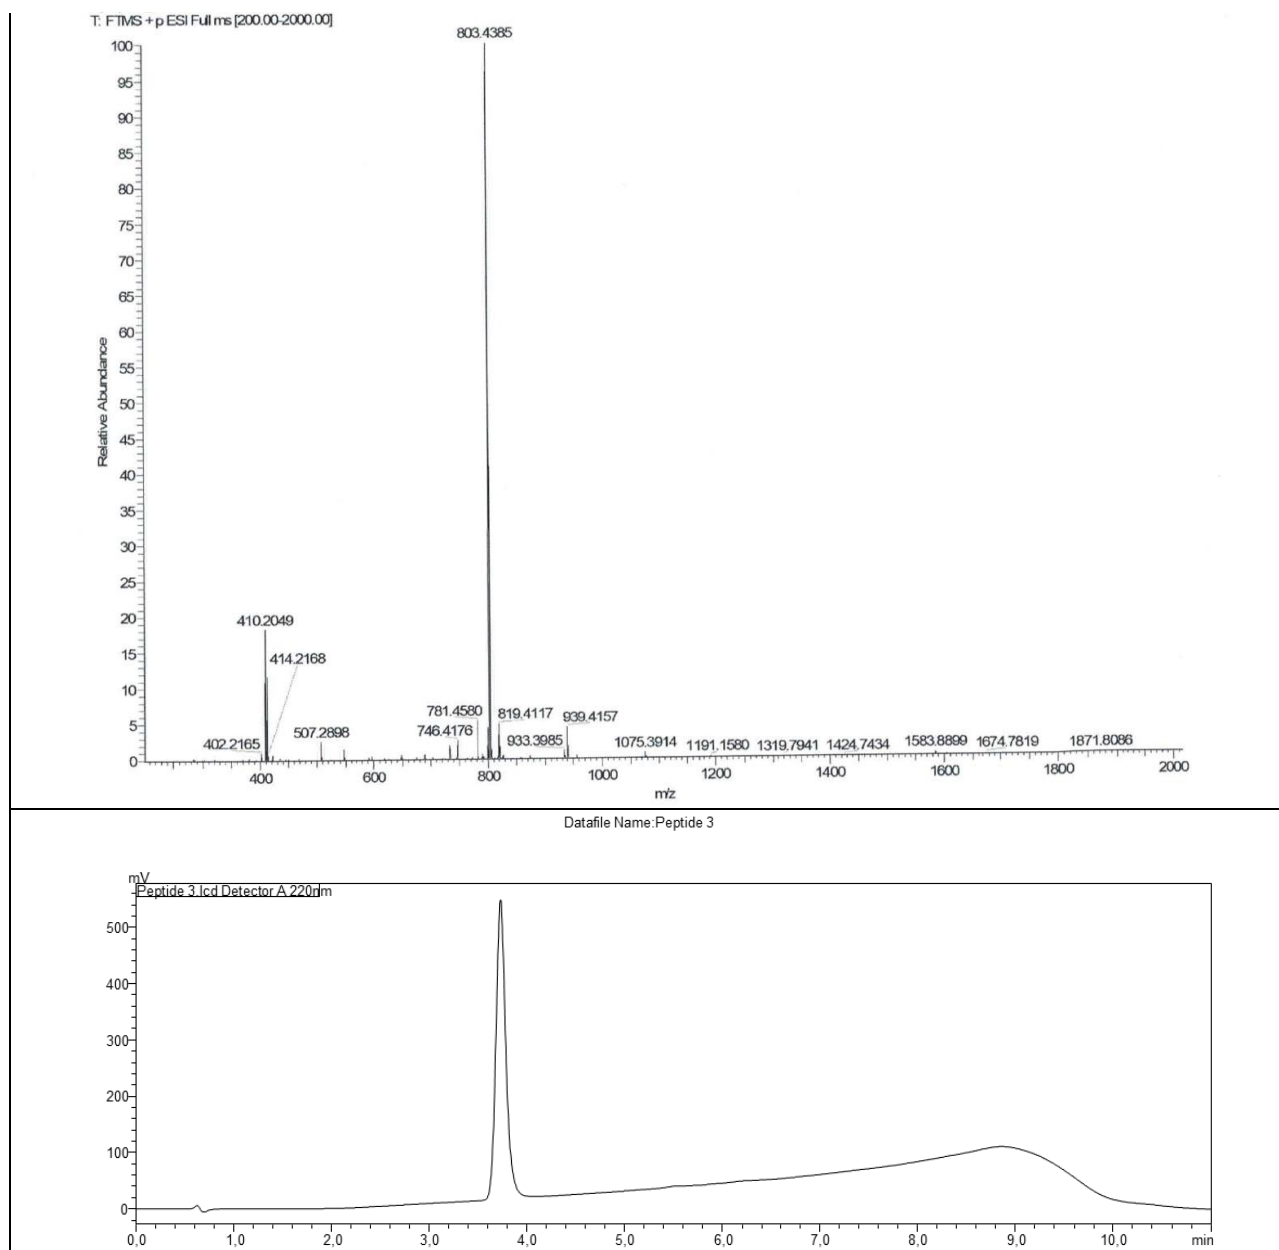

**Figure S12.** HR-ESI-MS of Peptide **3** ion  $[M+H]^+$  (top) and analytical HPLC trace at 220 nm (bottom).

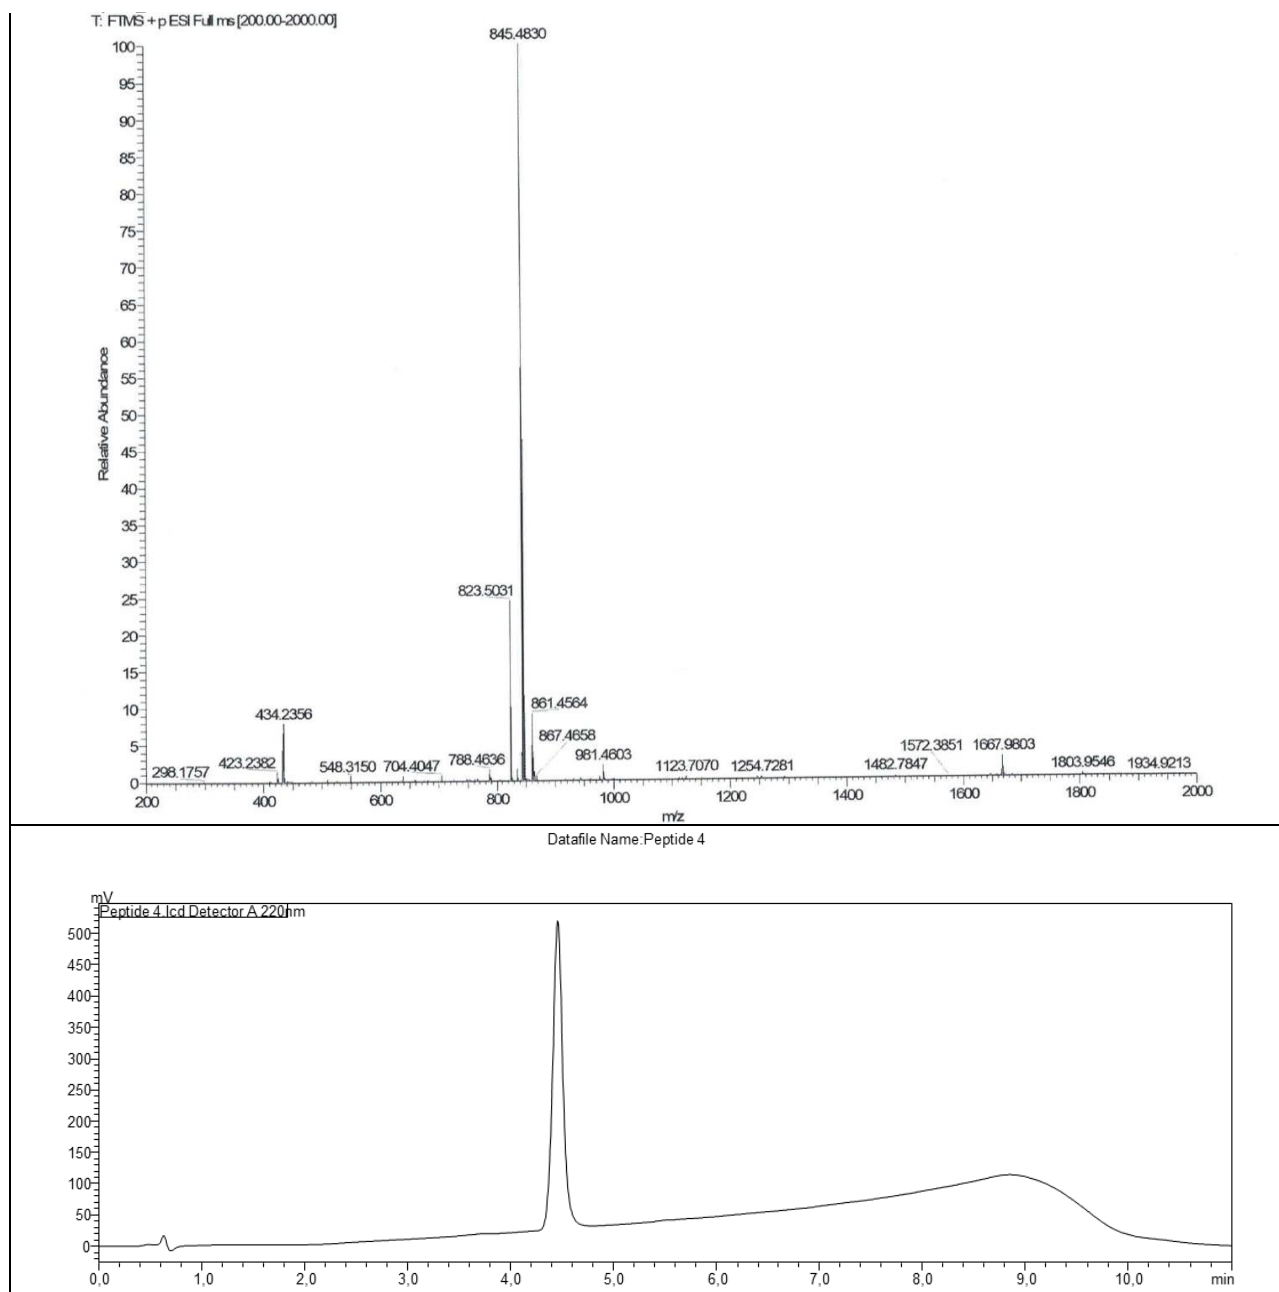

**Figure S13.** HR-ESI-MS of Peptide 4 ion  $[M+H]^+$  (top) and analytical HPLC trace at 220 nm (bottom).

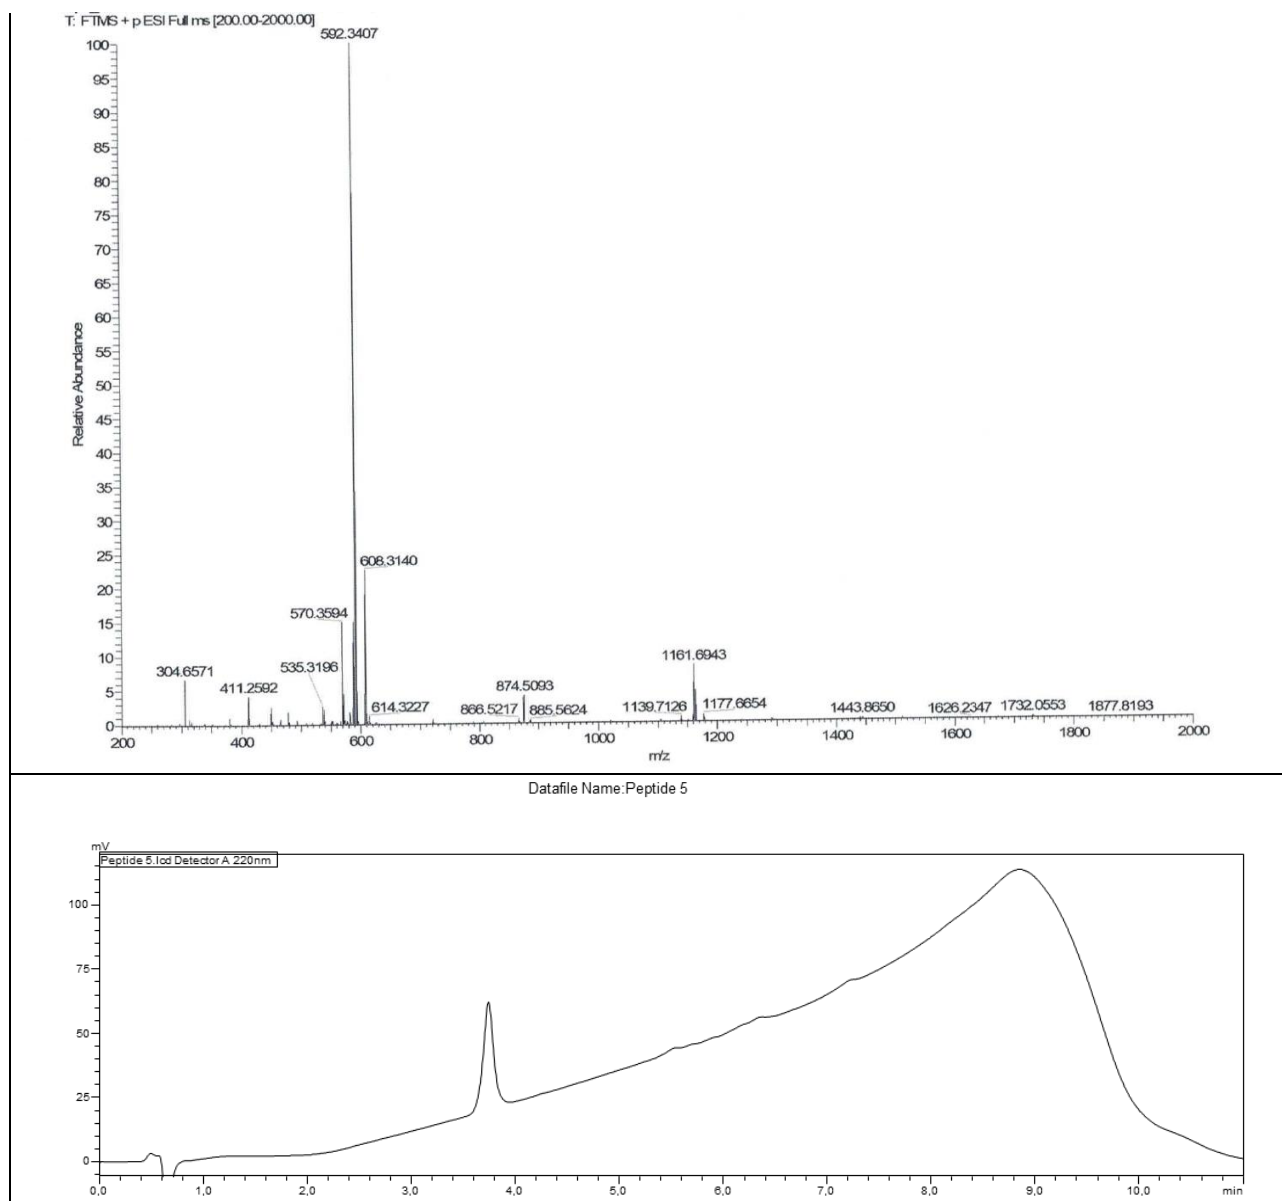

**Figure S14.** HR-ESI-MS of Peptide **5** ion  $[M+H]^+$  (top) and analytical HPLC trace at 220 nm (bottom).

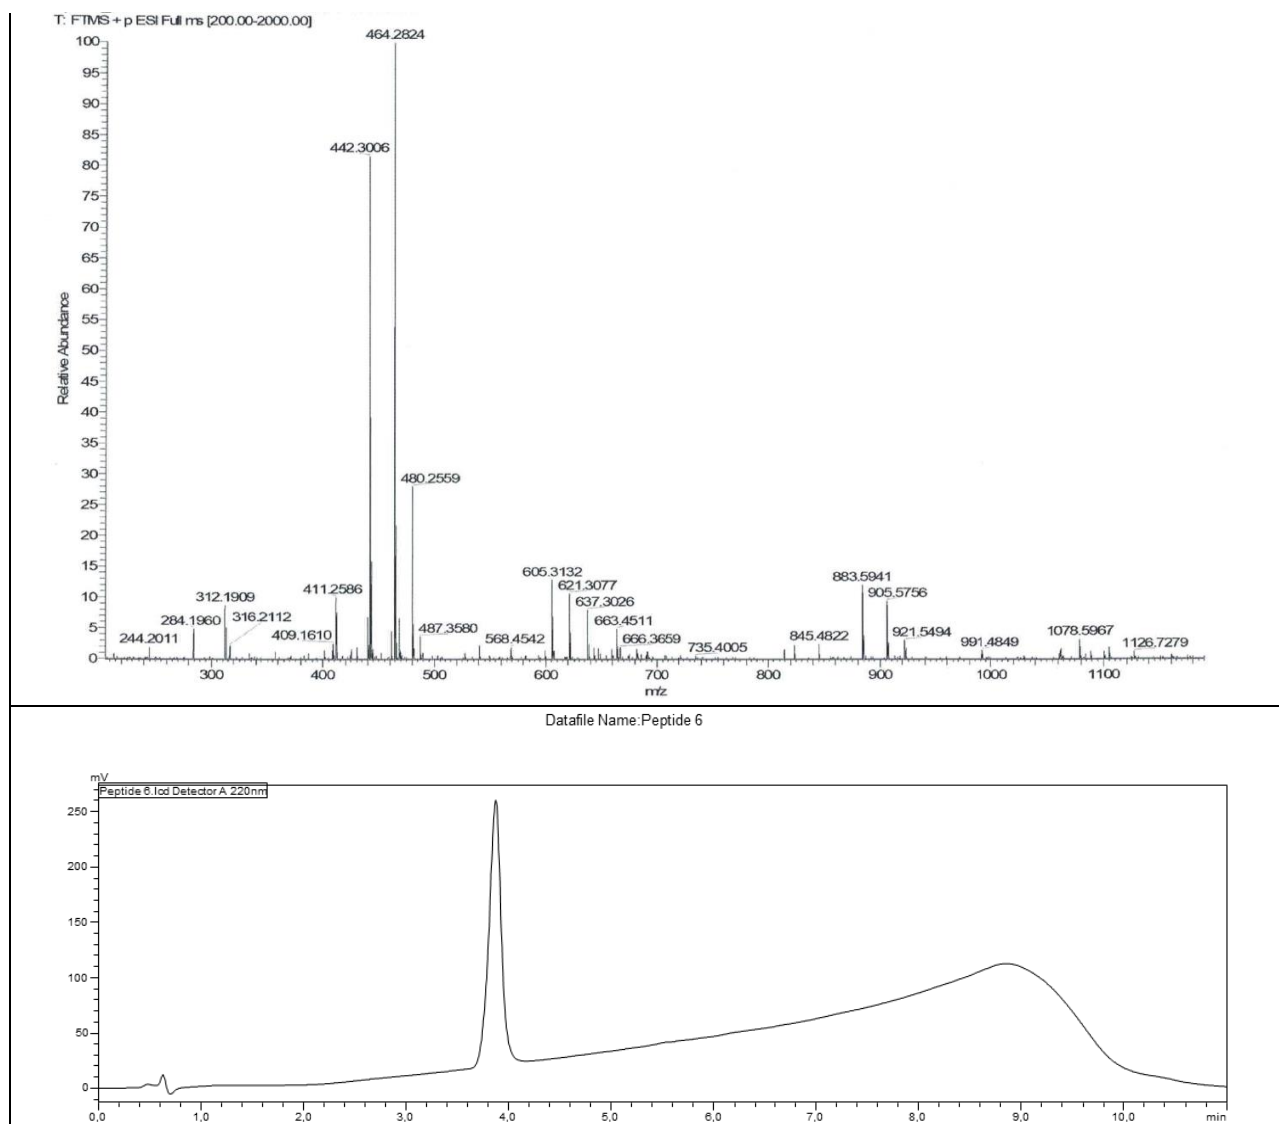

**Figure S15.** HR-ESI-MS of Peptide **6** ion  $[M+H]^+$  (top) and analytical HPLC trace at 220 nm (bottom).

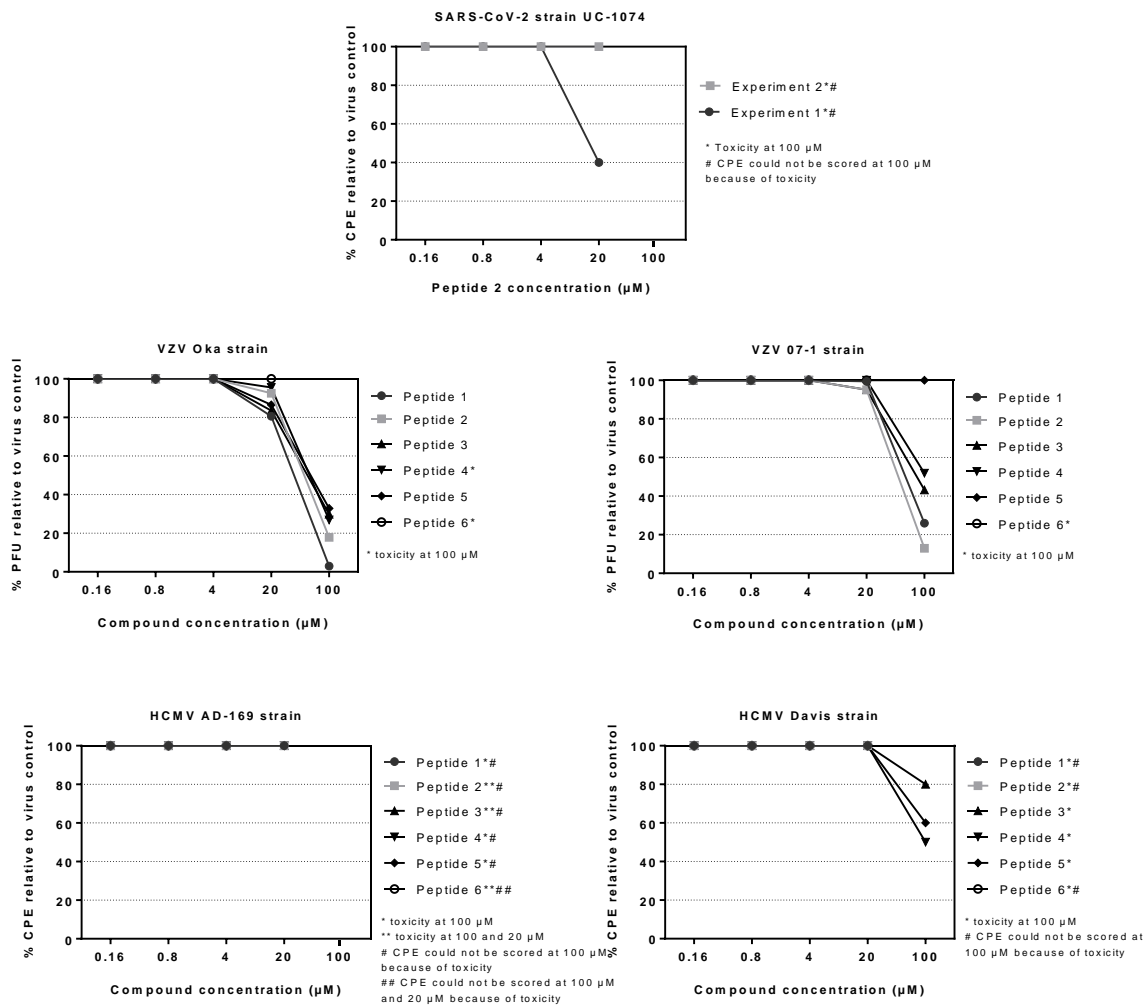

**Figure S16.** Representative dose-response curves.
